# Supplementary material
Source: publisher figshare collection journal article supplement (https://acs.figshare.com/ndownloader/files/8374154)
Supplement: Supplementary file 1 [file 8374154]

## Electrospinning Preparation of Nanostructured g-C<sub>3</sub>N<sub>4</sub>/BiVO<sub>4</sub> Composite Films with an Enhanced Photoelectrochemical Performance

Yan Wang<sup>a</sup>, Jianyang Sun<sup>b</sup>, Jiang Li<sup>a</sup>, Xu Zhao<sup>\*a, c</sup>

a, Key Laboratory of Drinking Water Science and Technology, Research Center for Eco-Environmental Sciences, Chinese Academy of Sciences, Beijing 100085, P.R. China.

b, Zhejiang University of Technology, College of Environment, Hangzhou, Zhejiang, 310032, P. R. China.

c, University of Chinese Academy of Sciences, Beijing 100049, P. R. China

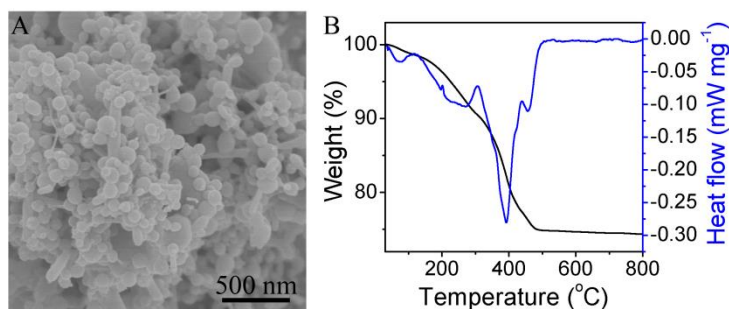

**Fig. S1** (A) SEM image and (B) TG-DSC curves of the precursor films.

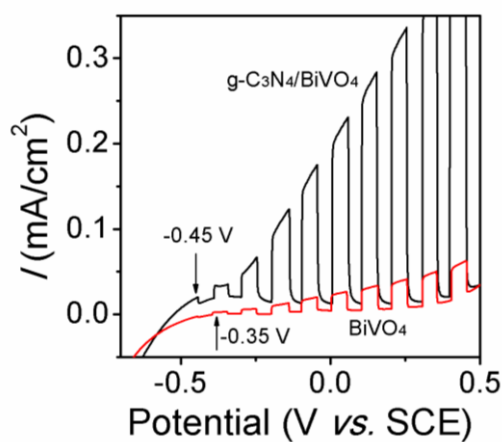

**Fig. S2** Magnified current–voltage curves of the samples under chopped visible light in 0.5 M phosphate buffer (pH 7) with Na<sub>2</sub>SO<sub>3</sub>.

**Table S1** Detailed dosages for the preparation of g-C<sub>3</sub>N<sub>4</sub>/ BiVO<sub>4</sub> sol

| Samples | m (g)<br>g-C <sub>3</sub> N <sub>4</sub> | m (g)<br>Bi(NO <sub>3</sub> ) <sub>3</sub> ·5H <sub>2</sub> O | m (g)<br>C <sub>15</sub> H <sub>21</sub> O <sub>6</sub> V | m (g)<br>CH <sub>3</sub> COOH | m (g)<br>Total | Proportion<br>(wt%) g-C <sub>3</sub> N <sub>4</sub> |
|---------|------------------------------------------|---------------------------------------------------------------|-----------------------------------------------------------|-------------------------------|----------------|-----------------------------------------------------|
| CN/BV-1 | 0.075                                    | 0.27                                                          | 0.195                                                     | 2.63                          | 3.17           | 2.4                                                 |
| CN/BV-2 | 0.125                                    | 0.27                                                          | 0.195                                                     | 2.63                          | 3.22           | 3.9                                                 |
| CN/BV-3 | 0.175                                    | 0.27                                                          | 0.195                                                     | 2.63                          | 3.27           | 5.4                                                 |

**Table S2** The crystal size for various samples

| Sample  | Calcination<br>temperature | Crystal size | Sample  | Calcination<br>temperature | Crystal<br>size |
|---------|----------------------------|--------------|---------|----------------------------|-----------------|
| BV      | 450 °C                     | 29.2 nm      | CN/BV-2 | 400 °C                     | 18.8 nm         |
| CN/BV-1 | 450 °C                     | 21.5 nm      | CN/BV-2 | 450 °C                     | 38.2 nm         |
| CN/BV3  | 450 °C                     | 30.8 nm      | CN/BV-2 | 500 °C                     | 34.4 nm         |

In TG-DSC curves of the precursor film (Fig. S1B), the weight loss and heat flow peaks before 306 °C are ascribed to be the removal of H<sub>2</sub>O and organics. The exothermic peak centered at 392 °C is corresponding to the crystallization of BiVO<sub>4</sub>, and the exothermic peak centered at 458 °C is caused by the burning of g-C<sub>3</sub>N<sub>4</sub>.

The potentials of the conductive band (CB) and valance band (VB) at the point of zero charge (pH zpc) were calculated according to the equations as follows<sup>1</sup>:

$$E_{VB} = X - 4.5 + 1/2E_g \quad (1)$$

$$E_{CB} = E_{VB} - E_g \quad (2)$$

Where  $E_g$  is the band gap energy, which is estimated to be 2.53 eV for BiVO<sub>4</sub> and 2.94 eV for g-C<sub>3</sub>N<sub>4</sub> from the Tauc plots analyzed (Fig. 7B and Fig. S1); 4.5 is the energy of free electrons on the hydrogen scale (4.5 eV vs NHE);  $E_{VB}$  and  $E_{CB}$  are respectively the valance band edge and conductive band edge;  $X$  is the absolute electronegativity of the semiconductor. According to previous reports, the  $X$  for g-C<sub>3</sub>N<sub>4</sub> is 4.730 eV<sup>2</sup> and for BiVO<sub>4</sub> is 6.035 eV.<sup>3</sup>

## References

- [1] X. Chang, T. Wang, P. Zhang, J. Zhang, A. Li, J. Gong, Enhanced Surface Reaction Kinetics and Charge Separation of p-n Heterojunction Co<sub>3</sub>O<sub>4</sub>/BiVO<sub>4</sub> Photoanodes, J. Am. Chem. Soc., 137 (2015) 8356-8359.
- [2] R. Hao, G. Wang, H. Tang, L. Sun, C. Xu, D. Han, Template-free preparation of macro/mesoporous g-C<sub>3</sub>N<sub>4</sub>/TiO<sub>2</sub> heterojunction photocatalysts with enhanced visible light photocatalytic activity, Appl. Catal. B-Environ., 187 (2016) 47-58.

[3] M. Long, W. Cai, J. Cai, B. Zhou, X. Chai, Y. Wu, Efficient Photocatalytic Degradation of Phenol over  $\text{Co}_3\text{O}_4/\text{BiVO}_4$  Composite under Visible Light Irradiation, J. Phy. Chem. B, 110 (2006) 20211-20216.
